# Supplementary material for: The Prevalence of Autism Spectrum Disorders in Adult Psychiatric Inpatients: A Systematic Review
Source: Clin Pract Epidemiol Ment Health. 2018 Aug 29;14:177–87. doi: 10.2174/1745017901814010177 (PMC6118035; doi:10.2174/1745017901814010177)
Supplement: Supplementary file 1 [file CPEMH-14-177_SD1.pdf]

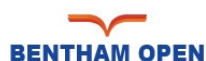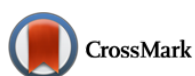

# Clinical Practice & Epidemiology in Mental Health

## Supplementary Material

Content list available at: [www.benthamopen.com/CPEMH/](http://www.benthamopen.com/CPEMH/)

DOI: 10.2174/1745017901814010177, 2018, 14, i

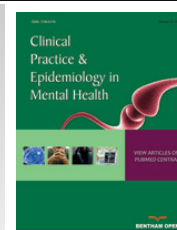

## The Prevalence of Autism Spectrum Disorders in Adult Psychiatric Inpatients: A Systematic Review

Samuel Tromans<sup>1,2,\*</sup>, Verity Chester<sup>3,4</sup>, Reza Kiani<sup>1,2</sup>, Regi Alexander<sup>1,5</sup> and Terry Brugha<sup>1,2</sup><sup>1</sup>Department of Health Sciences, University of Leicester, Leicester, Leicestershire, United Kingdom<sup>2</sup>Leicestershire Partnership NHS Trust, Leicester, Leicestershire, United Kingdom<sup>3</sup>Priory Group, Norwich, Norfolk, United Kingdom<sup>4</sup>Norwich Medical School, University of East Anglia, Norwich, United Kingdom<sup>5</sup>Hertfordshire Partnership University NHS Foundation Trust, Broadland Clinic & Astley Court, Norwich, United Kingdom

Received: April 25, 2018

Revised: May 22, 2018

Accepted: June 16, 2018

### SUPPLEMENTARY TABLE

| Summary Table                     | Database search | Ancestry method | Expert and grey literature | Overall |
|-----------------------------------|-----------------|-----------------|----------------------------|---------|
| Total records identified          | 7463            | 18              | 62                         | 7543    |
| Total duplicates                  | 3300            | 6               | 0                          | 3306    |
| Rejected immediately              | 4022            | 0               | 0                          | 4022    |
| Abstract reviewed then rejected   | 93              | 11              | 0                          | 104     |
| Full paper reviewed then rejected | 45              | 0               | 62                         | 107     |
| Accepted                          | 3               | 1               | 0                          | 4       |

© 2018 Tromans *et al.*

This is an open access article distributed under the terms of the Creative Commons Attribution 4.0 International Public License (CC-BY 4.0), a copy of which is available at: <https://creativecommons.org/licenses/by/4.0/legalcode>. This license permits unrestricted use, distribution, and reproduction in any medium, provided the original author and source are credited.
